# Supplementary material
Source: publisher figshare collection journal article supplement (https://sage.figshare.com/ndownloader/files/22107729)
Supplement: Supplementary file 1 [file 22107729]

**Supplemental Table 1:** Comparison of sample characteristics between HAALSI cohort (aged 40-79) and life-history sample

|                                 | HAALSI cohort | In HAALSI life-history sample | Not in HAALSI life-history sample |
|---------------------------------|---------------|-------------------------------|-----------------------------------|
| Observations                    | 4,509         | 2,491                         | 2018                              |
| Age                             |               |                               |                                   |
| Age 40-49                       | 20%           | 25%                           | 15%                               |
| Age 50-59                       | 31%           | 33%                           | 29%                               |
| Age 60-69                       | 29%           | 21%                           | 39%                               |
| Age 70-79                       | 19%           | 21%                           | 17%                               |
| Gender                          |               |                               |                                   |
| Women                           | 54%           | 58%                           | 53%                               |
| Men                             | 46%           | 42%                           | 47%                               |
| Education category              |               |                               |                                   |
| No formal education             | 42%           | 40%                           | 44%                               |
| Some primary (1-7 years)        | 36%           | 38%                           | 34%                               |
| Some secondary (8-11 years)     | 13%           | 13%                           | 12%                               |
| Secondary or more (12+ years)   | 10%           | 9%                            | 11%                               |
| Literacy                        |               |                               |                                   |
| Not literate                    | 45%           | 44%                           | 46%                               |
| Literate                        | 55%           | 56%                           | 54%                               |
| Country of origin               |               |                               |                                   |
| South Africa                    | 70%           | 71%                           | 71%                               |
| Mozambique                      | 30%           | 29%                           | 29%                               |
| Marital status                  |               |                               |                                   |
| Never married                   | 6%            | 6%                            | 6%                                |
| Separated / divorced            | 14%           | 14%                           | 13%                               |
| Widowed                         | 37%           | 27%                           | 26%                               |
| Currently married               | 53%           | 53%                           | 54%                               |
| Wealth                          |               |                               |                                   |
| First (lowest) quintile         | 20%           | 21%                           | 19%                               |
| Second quintile                 | 20%           | 20%                           | 19%                               |
| Third quintile                  | 20%           | 19%                           | 20%                               |
| Fourth quintile                 | 20%           | 20%                           | 21%                               |
| Fifth (highest) quintile        | 20%           | 20%                           | 22%                               |
| Father's education              |               |                               |                                   |
| No formal education             | 85%           | 84%                           | 85%                               |
| Some education                  | 15%           | 16%                           | 15%                               |
| Father's occupational class     |               |                               |                                   |
| Skilled                         | 50%           | 50%                           | 49%                               |
| Unskilled                       | 29%           | 29%                           | 29%                               |
| Other                           | 11%           | 11%                           | 11%                               |
| Don't know                      | 10%           | 10%                           | 10%                               |
| HIV status                      |               |                               |                                   |
| HIV negative                    | 68%           | 69%                           | 66%                               |
| HIV positive                    | 23%           | 24%                           | 21%                               |
| Refused or indeterminate result | 9%            | 6%                            | 13%                               |

**Supplemental Table 1** (continued)

|                          |     |     |     |
|--------------------------|-----|-----|-----|
| Depression               |     |     |     |
| No depressive symptoms   | 83% | 83% | 83% |
| Depressive symptoms      | 17% | 17% | 17% |
| PTSD                     |     |     |     |
| No PTSD symptoms         | 95% | 95% | 95% |
| PTSD symptoms            | 5%  | 5%  | 5%  |
| ADL disability           |     |     |     |
| No ADL disability        | 93% | 94% | 92% |
| 1+ ADL disability        | 7%  | 6%  | 8%  |
| Cognitive impairment     |     |     |     |
| Not cognitively impaired | 94% | 95% | 93% |
| Cognitively impaired     | 6%  | 5%  | 7%  |
